# Supplementary material for: Effects ofNemacystus decipienspolysaccharide on mice with antibiotic associated diarrhea and colon inflammation
Source: Royal Society of Chemistry journal article supplement (doi:10.1039/d1fo02813h), 2023-01-01
Supplement: d1fo02813h1.pdf [file d1fo02813h1.pdf]

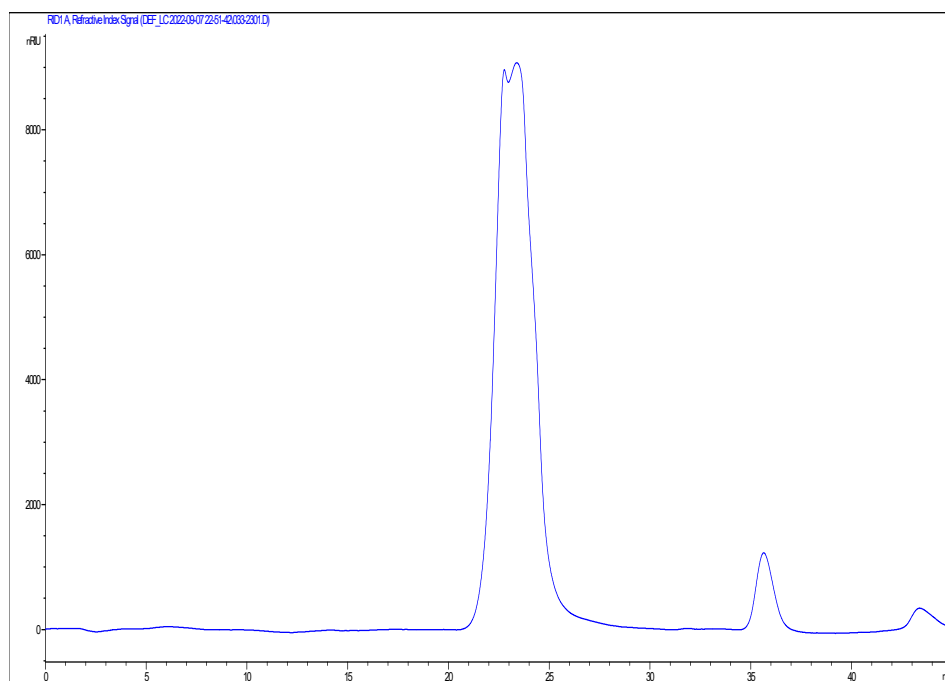

Figure S1. The GPC spectrum of NDH0 (The peak at about 37 min was the absorption of  $\text{NaNO}_3$ ).

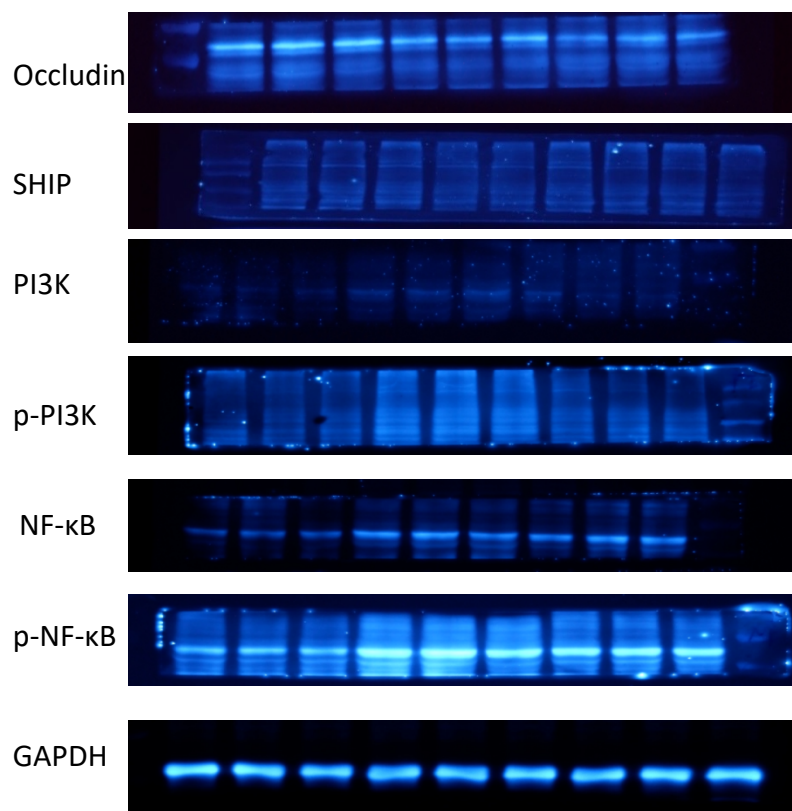

Figure S2. Raw images of data from Western blot.

Table S1. Kits used in biology tests.

| Chemicals or kit      | Cat log #  |
|-----------------------|------------|
| Clindamycin           | MB1345-1   |
| Ampicillin            | MB1507-1   |
| Ceftriaxone sodium    | MB1333-1   |
| Vancomycin            | MB1260-1   |
| Stool DNA kit         | D4015-02   |
| Q Sepharose Fast Flow | 17-0709-01 |
| Trifluoroacetic acid  | 76-05-1    |
| Isoflurane            | 26675-46-7 |
| Total RNA extract kit | DP419      |
| SYBR Green            | DRR820A    |

Table S2. The composition of mice food.

| Diet composition | Percentage %  |
|------------------|---------------|
| Crude ash        | $\leq 8$ %    |
| Crude protein    | $\geq 21$ %   |
| Crude fat        | $\geq 4.5$ %  |
| Crude fiber      | $\leq 5$ %    |
| Lysine           | $\geq 1.32$ % |
| Methionine       | $\geq 0.4$ %  |
| Ca               | 1.0–1.8 %     |
| P                | 0.6–1.2 %     |
| NaCl             | $\leq 1.0$ %  |
| Moisture         | $\leq 10$ %   |

Table S3. The primers used in the experiment.

| Primer name  | Forward (5'-3')         | Reverse (5'-3')         |
|--------------|-------------------------|-------------------------|
| GAPDH        | GCATCCACTGGTGCTGCC      | TCATCATACTTGGCAGGTTTC   |
| SHIP1        | GAGACTGTTTCAGCGTCTAC    | CGTCTTCAAAAAGTCGGAATCCA |
| SHIP2        | CGTCTTCAAAAAGTCGGAATCCA | CAGAGTCGTCCCGTGTCTTTC   |
| IL-6         | CAGAGTCGTCCCGTGTCTTTC   | TCCACGATTCCCAGAGA       |
| IL-1 $\beta$ | TTGAAGAAGAGCCCATCCTC    | CAGCTCATATGGGTCCGAC     |

Table S4. The antibody used in the experiment.

| Antibody                                                               | Company                   | Dilute ratio |
|------------------------------------------------------------------------|---------------------------|--------------|
| PI3 Kinase p110 $\alpha$ (C73F8) Rabbit mAb #4249                      | Cell Signaling Technology | 1:1000       |
| Phospho-PI3 Kinase p85 (Tyr458)/p55 (Tyr199) (E3U1H) Rabbit mAb #17366 | Cell Signaling Technology | 1:1000       |
| Occludin (E6B4R) Rabbit mAb #91131                                     | Cell Signaling Technology | 1:1000       |
| SHIP1 (C15C9) Rabbit mAb #2725                                         | Cell Signaling Technology | 1:1000       |
| NF- $\kappa$ B p65 (D14E12) XP <sup>®</sup> Rabbit mAb #8242           | Cell Signaling Technology | 1:1000       |
| Phospho-NF- $\kappa$ B p65 (Ser536) (93H1) Rabbit mAb #3033            | Cell Signaling Technology | 1:1000       |
| GAPDH (D16H11) XP <sup>®</sup> Rabbit mAb #5174                        | Cell Signaling Technology | 1:1000       |
| Anti-rabbit IgG, HRP-linked Antibody #7074                             | Cell Signaling Technology | 1:5000       |
| Anti-mouse IgG, HRP-linked Antibody #7076                              | Cell Signaling Technology | 1:5000       |

Table S5. Effect of NDH0 on body weight (up) and Effect of NDH0 on cecum index (down).Control (control group): mice were treated with saline from day 1 to day 14 by gavage; Model (model group): mice were treated with mixture of antibiotics (500 ug/ mL) from day 0 to day 6 for free drinks and saline from day 1 to day 14 by gavage; NDH0 (NDH0 group): mice were treated with mixture of antibiotics (500 ug/ mL) from day 0 to day 6 and NDH0 polysaccharides (30 mg/kg/d) from day 1 to day 14 by gavage.

| D  | Control (g) |       |       |       | Model(g) |       |       |       | NDH0 (g) |        |       |       |       |       |       |       |       |
|----|-------------|-------|-------|-------|----------|-------|-------|-------|----------|--------|-------|-------|-------|-------|-------|-------|-------|
| ay |             |       |       |       |          |       |       |       |          |        |       |       |       |       |       |       |       |
| 0  | 19.16       | 19.05 | 19.28 | 19.28 | 18.88    | 20.06 | 21.00 | 20.63 | 20.53    | 18.84  | 19.16 | 19.05 | 19.28 | 19.28 | 18.88 | 20.53 | 18.84 |
| 1  | 22.32       | 21.04 | 19.92 | 19.05 | 19.52    | 17.67 | 17.77 | 17.06 | 16.79    | 16.68  | 16.09 | 16.15 | 17.64 | 18.25 | 18.42 | 17.42 | 16.03 |
| 3  | 21.65       | 20.00 | 21.94 | 19.44 | 19.83    | 15.03 | 16.12 | 15.76 | 16.16    | 15.15  | 16.16 | 17.08 | 16.79 | 15.08 | 16.76 | 16.02 | 16.16 |
| 5  | 20.22       | 20.64 | 22.04 | 22.18 | 20.86    | 15.02 | 14.06 | 14.09 | 13.15.2  | 17.05  | 18.69 | 19.05 | 18.42 | 18.67 | 17.77 | 17.06 | 17.06 |
| 7  | 22.83       | 21.03 | 21.79 | 21.96 | 22.96    | 14.01 | 15.01 | 15.07 | 15.06    | 14.665 | 19.84 | 19.27 | 18.08 | 19.05 | 19.28 | 19.28 | 19.28 |
| 9  | 21.83       | 22.03 | 22.79 | 22.56 | 22.96    | 16.01 | 16.01 | 15.08 | 15.04    | 17.236 | 19.06 | 20.81 | 19.33 | 20.92 | 19.05 | 19.05 | 19.52 |
| 11 | 24.05       | 22.05 | 22.08 | 23.04 | 24.628   | 18.28 | 18.88 | 17.53 | 19.04    | 17.82  | 22.02 | 22.21 | 21.22 | 22.22 | 22.01 | 22.05 | 20.05 |
| 14 | 23.09       | 25.03 | 24.02 | 25.02 | 23.36    | 21.06 | 19.06 | 17.08 | 18.02    | 19.56  | 22.04 | 22.01 | 22.04 | 23.04 | 22.06 | 22.07 | 21.02 |

| Control (mg/g) | Model (mg/g) | NDH0 (mg/g) |
|----------------|--------------|-------------|
| 5.879828       | 9.494382     | 6.792453    |
| 5.983263       | 9.450549     | 6.696833    |
| 6.157025       | 8.974359     | 6.919643    |
| 5.992064       | 9.081633     | 6.99115     |
| 6.007905       | 8.37963      | 7.035398    |
|                |              | 7.092511    |
|                |              | 6.923077    |

Table S6. Relative abundance of gut microbiota at the phylum level in each group.

| ID              | Con<br>1         | Con<br>3         | Con<br>2         | Con<br>4         | Con<br>5         | Mod<br>el1       | Mod<br>el2       | Mod<br>el3       | Mod<br>el4       | Mod<br>el5       | NDH<br>01        | NDH<br>02        | NDH<br>03        | NDH<br>04        | NDH<br>05        |
|-----------------|------------------|------------------|------------------|------------------|------------------|------------------|------------------|------------------|------------------|------------------|------------------|------------------|------------------|------------------|------------------|
| Bacteroidetes   | 0.63<br>142<br>1 | 0.80<br>448<br>4 | 0.84<br>630<br>5 | 0.65<br>050<br>3 | 0.80<br>908<br>8 | 0.00<br>454<br>6 | 0.54<br>819<br>7 | 0.66<br>987<br>1 | 0.00<br>075<br>4 | 0.00<br>031<br>9 | 0.75<br>156<br>2 | 0.61<br>598<br>2 | 0.69<br>702<br>5 | 0.59<br>118<br>3 | 0.08<br>269<br>9 |
| Proteobacteria  | 0.01<br>366<br>5 | 0.03<br>015<br>9 | 0.02<br>961<br>8 | 0.02<br>020<br>6 | 0.03<br>248<br>6 | 0.85<br>523<br>1 | 0.41<br>126<br>7 | 0.27<br>393<br>8 | 0.99<br>853<br>4 | 0.99<br>955<br>5 | 0.19<br>030<br>3 | 0.16<br>929<br>3 | 0.21<br>939<br>3 | 0.17<br>564<br>2 | 0.81<br>296<br>1 |
| Firmicutes      | 0.34<br>914<br>3 | 0.15<br>499      | 0.12<br>135      | 0.32<br>300<br>4 | 0.15<br>000<br>7 | 0.14<br>003<br>1 | 0.04<br>041<br>8 | 0.05<br>522<br>2 | 0.00<br>017<br>5 | 0.00<br>01       | 0.03<br>705<br>6 | 0.13<br>280<br>9 | 0.07<br>105<br>5 | 0.11<br>520<br>9 | 0.05<br>961<br>8 |
| Verrucomicrobia | 0                | 0                | 0                | 2.34<br>E-05     | 0                | 0                | 5.55<br>E-05     | 0.00<br>082<br>8 | 0                | 0                | 0.01<br>940<br>8 | 0.07<br>928<br>7 | 0.01<br>064<br>5 | 0.11<br>378<br>8 | 0.00<br>026<br>7 |
| Actinobacteria  | 0.00<br>256      | 0.00<br>917<br>6 | 0.00<br>134<br>6 | 0.00<br>336      | 0.00<br>467<br>3 | 0                | 4.17<br>E-05     | 4.43<br>E-05     | 0.00<br>049<br>6 | 1.25<br>E-05     | 0.00<br>073<br>7 | 0.00<br>118<br>1 | 0.00<br>089<br>5 | 0.00<br>350<br>2 | 0.03<br>051<br>3 |
| Tenericutes     | 0.00<br>169<br>5 | 0.00<br>018      | 0.00<br>032<br>5 | 0.00<br>182<br>6 | 0.00<br>210<br>5 | 0                | 0                | 0                | 0                | 0                | 5.11<br>E-05     | 0                | 0                | 0                | 0                |
| [Thermi]        | 0                | 0                | 0                | 0                | 0                | 0                | 0                | 0                | 0                | 0                | 0                | 0                | 0                | 0                | 0.00<br>608<br>4 |
| TM7             | 0.00<br>097<br>7 | 0.00<br>038<br>8 | 0.00<br>040<br>6 | 0.00<br>039<br>8 | 0.00<br>110<br>9 | 0                | 0                | 0                | 0                | 0                | 0                | 0                | 0                | 0                | 5.33<br>E-05     |
| OD1             | 0                | 0                | 2.32<br>E-05     | 0                | 2.26<br>E-05     | 0                | 0                | 0                | 0.00<br>001<br>4 | 0                | 0                | 0                | 0                | 0                | 0.00<br>271<br>9 |
| Cyanobacteria   | 0                | 0                | 0                | 0                | 0                | 0                | 0                | 0                | 0.00<br>001<br>4 | 0                | 0                | 0                | 0                | 0                | 0.00<br>167<br>5 |
| Others          | 0.00<br>053<br>9 | 0.00<br>062<br>3 | 0.00<br>062<br>7 | 0.00<br>067<br>9 | 0.00<br>050<br>9 | 0.00<br>019<br>2 | 2.08<br>E-05     | 9.61<br>E-05     | 0.00<br>001<br>4 | 1.25<br>E-05     | 0.00<br>088<br>3 | 0.00<br>144<br>9 | 0.00<br>098<br>7 | 0.00<br>067<br>7 | 0.00<br>341<br>2 |



Table S7. Different bacteria at genus levels.

Blautia

| Control  | Model    | NDH0     |
|----------|----------|----------|
| 0.00144  | 0.029537 | 0.004494 |
| 0.000625 | 0.019939 | 0.001309 |
| 0.000858 | 0.004523 | 0.014529 |
| 0.000669 | 0.011649 | 0.002749 |
| 0.000756 | 0.029537 | 0        |

Enterobacter

| Control  | Model    | NDH0     |
|----------|----------|----------|
| 2.91E-05 | 0.768095 | 0        |
| 7.27E-05 | 0.391457 | 7.27E-05 |
| 7.27E-05 | 0.313434 | 0        |
| 0.000175 | 0.20708  | 0        |
| 4.36E-05 | 0.000436 | 0.006108 |

Proteus

| Control  | Model    | NDH0     |
|----------|----------|----------|
| 0        | 0.029392 | 0        |
| 1.45E-05 | 0.005308 | 2.91E-05 |
| 0        | 0.006777 | 1.45E-05 |
| 0        | 0.020055 | 2.91E-05 |
| 0        | 0        | 0.000145 |

Enterococcus

| Control | Model    | NDH0     |
|---------|----------|----------|
| 0       | 0.006224 | 0.00096  |
| 0       | 0.001091 | 0.000974 |
| 0       | 0.004218 | 0.001382 |
| 0       | 0.000378 | 0.003156 |
| 0       | 0.000553 | 0        |

Clostridioides

| Control | Model    | NDH0 |
|---------|----------|------|
| 0       | 0.104449 | 0    |
| 0       | 0.019517 | 0    |
| 0       | 0.146289 | 0    |
| 0       | 0.033217 | 0    |
| 0       | 0        | 0    |

Muribaculum

| Control   | Model         | NDH0       |
|-----------|---------------|------------|
| 0.3595934 | 0.000000      | 0.1036198  |
| 0.3738165 | 0.000000      | 0.02371984 |
| 0.4428092 | 5.820000e-005 | 0.01330696 |
| 0.4167479 | 0.000000      | 0.0363869  |
| 0.4534256 | 0.000000      | 0.018673   |

#### Ruminococca

| Control     | Model       | NDH0        |
|-------------|-------------|-------------|
| 0.02082576  | 0.000000    | 0.001192536 |
| 0.01093643  | 0.000000    | 0.01995317  |
| 0.01282704  | 0.004261136 | 0.000596268 |
| 0.03065691  | 0.000770786 | 0.005831794 |
| 0.009642094 | 0.000218    | 0.0000582   |
| 0.001411    | 0.0000873   | 0.0000436   |

#### Lactobacillus

| Control     | Model        | NDH0        |
|-------------|--------------|-------------|
| 0.006878899 | 0.000000     | 0.00213784  |
| 0.009613007 | 0.000000     | 0.003286747 |
| 0.01308881  | 0.000000     | 0.001105278 |
| 0.004348395 | 0.0000290863 | 0.007198848 |
| 0.01060194  | 0.000000     | 0.006559    |

#### Fecalibaculum

| Control     | Model | NDH0        |
|-------------|-------|-------------|
| 0.004057533 | 0.    | 0.009685723 |
| 0.01006384  | 0.    | 0.0159829   |
| 0.003184945 | 0.    | 0.004639258 |
| 0.002225099 | 0.    | 0.06772734  |
| 0.008856765 | 0.    | 0.001062    |

#### Bifidobacterium

| Control     | Model | NDH0        |
|-------------|-------|-------------|
| 0.001090735 | 0.    | 0.000639898 |
| 0.000712613 | 0.    | 0.001294338 |
| 0.005133724 | 0.    | 0.000828958 |
| 0.002457789 | 0.    | 0.003577609 |
| 0.003083143 | 0.    | 0.001789    |
